# Supplementary material
Source: PubMed Central journal article supplement (PMC2629798)

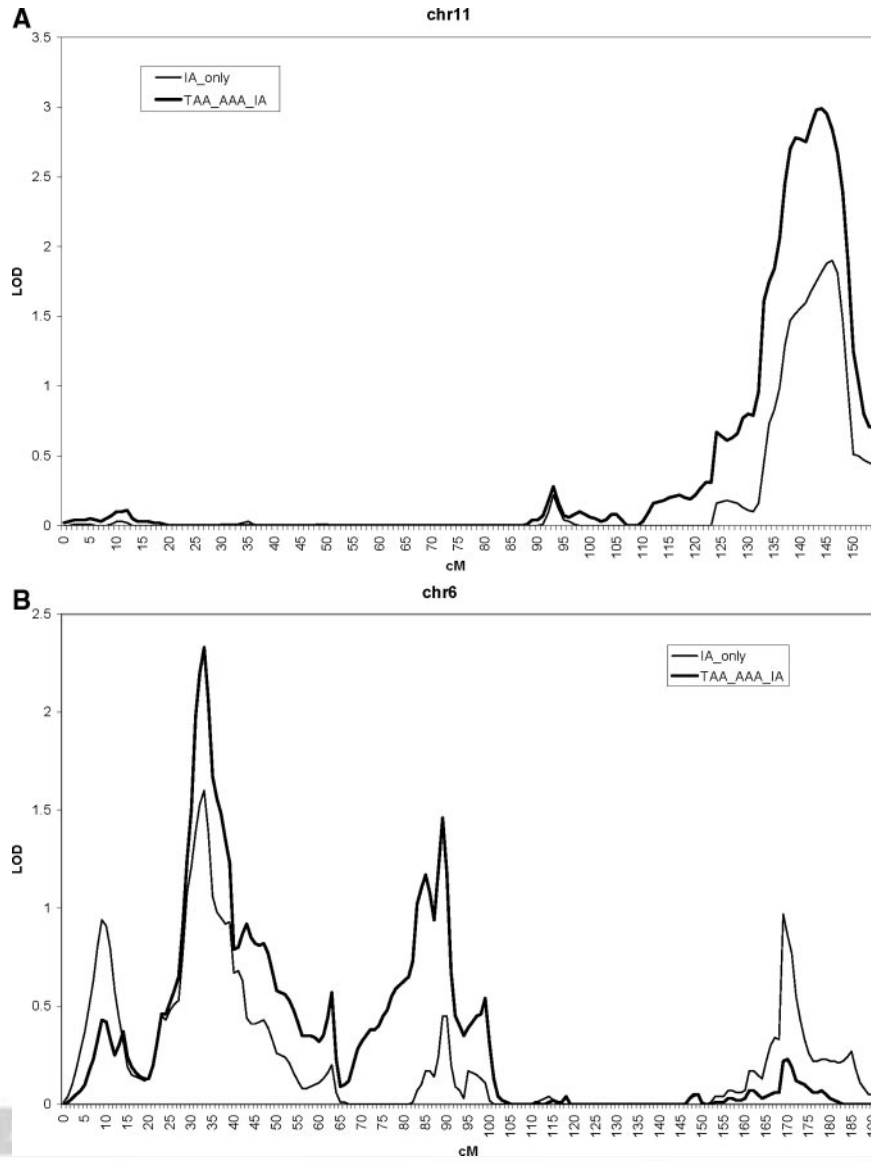

Figure 1. Linkage results for fine mapping of chromosome 11 (A) and chromosome 6 (B).

Supplement: NIHMS82767-supplement-01.pdf [file NIHMS82767-supplement-01.pdf]
